# Supplementary material for: Multilevel regulation of the glass locus during Drosophila eye development
Source: bioRxiv or medRxiv preprint supplement (doi:10.1101/537118), 2019-01-31

# Figure S3

A

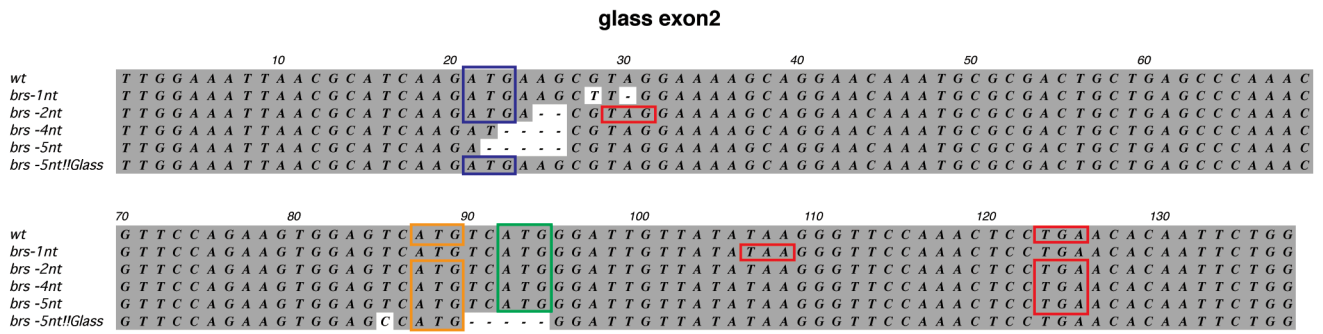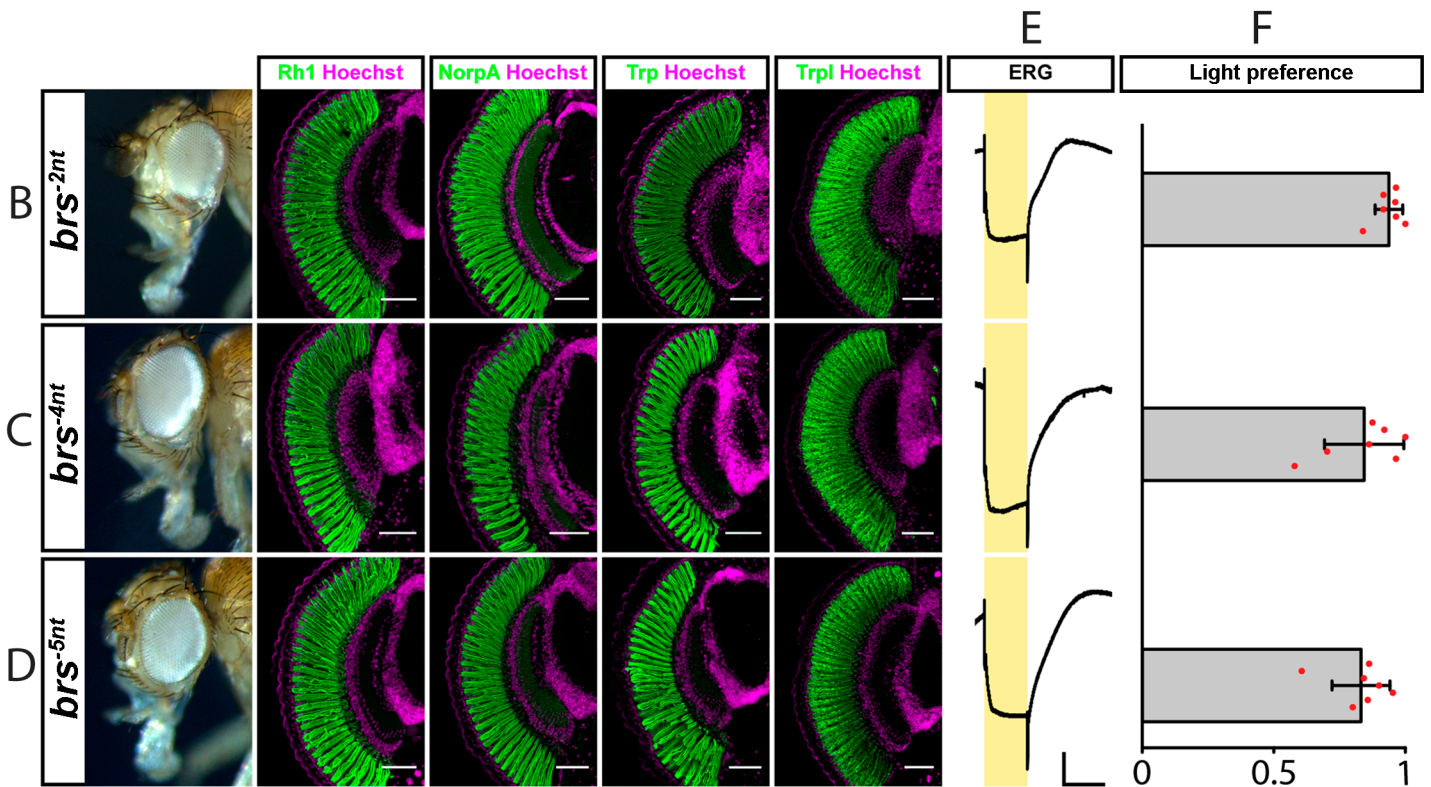

Supplement: Supplementary file [file media-3.pdf]
